# Supplementary material
Source: HighWire-hosted journal article supplement (https://bmjmedicine.bmj.com/highwire/filestream/348/field_highwire_adjunct_files/6/bmjmed-2022-000154supp007_data_supplement.pdf)
Supplement: bmjmed-2022-000154supp007_data_supplement.pdf [file bmjmed-2022-000154supp007_data_supplement.pdf]

**Appendix 7:***Number of events (MACE and SAE) in trials at week 12, 18, 26 and 52*

|             | <b>Week 12</b> |         | <b>Week 18</b> |         | <b>Week 26</b> |         | <b>Week 52</b> |         |
|-------------|----------------|---------|----------------|---------|----------------|---------|----------------|---------|
|             | Canagliflozin  | Placebo | Canagliflozin  | Placebo | Canagliflozin  | Placebo | Canagliflozin  | Placebo |
| <b>MACE</b> |                |         |                |         |                |         |                |         |
| Study 1     | 1              | 0       | 1              | 0       | 1              | 0       | 1              | 0       |
| Study 2     | 0              | 0       | 0              | 0       | 0              | 0       | 0              | 0       |
| Study 3     | 1              | 1       | 1              | 1       | 1              | 1       | 2              | 2       |
| Study 4     | 5              | 3       | 6              | 3       | 6              | 3       | 12             | 6       |
| Study 5     | 2              | 0       | 3              | 0       | 3              | 0       | 3              | 0       |
| Study 6     | 3              | 3       | 5              | 4       | 5              | 4       | 5              | 4       |
| Study 7     | 34             | 27      | 50             | 37      | 50             | 37      | 91             | 58      |
| Study 8     | 4              | 2       | 5              | 3       | 5              | 3       | 8              | 7       |
| Study 9     | 1              | 3       | 1              | 3       | 1              | 3       | 1              | 3       |
| Study 10    | 1              | 5       | 1              | 5       | 1              | 5       | 1              | 5       |
| Study 11    | 48             | 61      | 66             | 80      | 66             | 80      | 113            | 141     |
| Study 12    | 1              | 1       | 1              | 1       | 1              | 1       | 1              | 2       |
| <b>SAE</b>  |                |         |                |         |                |         |                |         |
| Study 1     | 5              | 1       | 5              | 1       | 5              | 1       | 5              | 1       |
| Study 2     | 3              | 0       | 3              | 1       | 3              | 1       | 3              | 1       |
| Study 3     | 7              | 5       | 10             | 8       | 10             | 8       | 15             | 13      |
| Study 4     | 19             | 12      | 21             | 15      | 21             | 15      | 41             | 24      |
| Study 5     | 15             | 11      | 18             | 12      | 18             | 12      | 18             | 12      |
| Study 6     | 24             | 10      | 29             | 11      | 29             | 11      | 29             | 11      |
| Study 7     | 154            | 87      | 218            | 121     | 218            | 121     | 1385           | 691     |
| Study 8     | 13             | 7       | 20             | 11      | 20             | 11      | 86             | 42      |

|          |     |     |     |     |     |     |     |     |
|----------|-----|-----|-----|-----|-----|-----|-----|-----|
| Study 9  | 17  | 6   | 18  | 7   | 18  | 7   | 18  | 7   |
| Study 10 | 10  | 3   | 10  | 4   | 10  | 4   | 10  | 4   |
| Study 11 | 181 | 203 | 253 | 282 | 253 | 282 | 766 | 858 |
| Study 12 | 1   | 1   | 2   | 1   | 2   | 1   | 2   | 2   |
